# Supplementary material for: Cutaneous Melanoma with Brain Metastasis: Report of 193 Patients with New Observations
Source: PLoS One. 2016 May 23;11(5):e0156115. doi: 10.1371/journal.pone.0156115 (PMC4877095; doi:10.1371/journal.pone.0156115)
Supplement: S1 Dataset — (XLSX) [file pone.0156115.s001.xlsx]

## Sheet: Melanoma with brain metastasis
Patient	Melanoma	Age melanoma	Age brain metastasis	Melanoma to brain mets	Sex	Location melanoma	Subtype melanoma	Breslow	Clark	T classification	N classification	Mutation status	Extent brain mets	Lymph node status	Other metastases	Time course	Primary melanoma	Second melanoma
1	1	59	61	2.8	1	3		9	4	4	2	0	1	1	1	2	1	0
2	1		59		0							2	1		1	1	0	0
3	1		73		1							2	0		1	2	0	0
4	1		75		0							2	1	1	1	1	0	0
5	1	67	72	4.3	1	0		1.5	3	2		2	0		1	1	1	0
6	1	64	67	2.7	1	2	1	3	4	3	1	0	0	1	0	2	1	0
7	1	52	56	3.6	1	2	1	3.75	4	3	0	0	0	0	0	3	1	1
8	1	67	71	4	1	1	2	0.66	2	1		1	1		1	1	1	0
9	1		71		0							0	1		0		0	0
10	1		73		1							2	1		0		1	0
11	1	66	69	3.1	1	2	0	1.5	4	2	1	0	0	1	0	2	1	0
12	1	33	35	1.4	1	0	1	9	4	4	2	1	1	1	0	2	1	0
13	1	47	56	8.9	1	0	4	10	3	4	1	0	1	1	1	2	1	0
14	1	52	54	2.3	1	4	0	1.25	4	2	2	0	1	1	1	2	1	0
15	1	34	35	0.4	0	5	5					0	0		1	1	1	0
16	1		76		1						1	1	0	1	0	1	0	0
17	1	53	62	9.3	0	0					0	2	0	0	1	0	1	0
18	1	60	63	2.9	0	4	3	4.01	4	4	1	1	0	1	0	2	1	0
19	1	51	56	5.9	1	4	1	3.9	4	3	0	0	1	0	1	2	1	0
20	1	68	69	1.1	0	2	1	4.5		4	1	0	0	1	1	2	1	0
21	1	36	57	20.7	0	3		1.1	3	2	0	0	1	0	0	3	1	0
22	1	59	60	1.3	1	0	2	0.35		1		1	1		0		1	0
23	1	62	66	4.1	1	1	1	4.1	3	4	0	0	0	0	1	2	1	0
24	1	41	57	16.7	1	1	0	1.7	3	2	1	0	1	1	1	2	1	0
25	1	48	54	5.8	0	4	1	1.45	4	2	3	0	1	1	1	2	1	0
26	1	49	54	5.1	1	2	0	1.78	4	2	1	0	1	1	0	2	1	0
27	1	63	66	3.4	1	0	4	12	4	4	2	2	0	1	0	1	1	0
28	1		62		0						0	0	1	0	1	1	1	1
29	1	57	59	1.4	0	0	2	0.35	3	1	3	1	1	1	1	2	1	0
30	1	50	54	3.8	1	3						0	1		1	1	1	0
31	1	47	48	0.9	1	1	1	5	3	4	1	1	1	1	1	2	1	0
32	1	40	43	2.8	1	0	4	2.5	4	3	2	2	1	1	1	2	1	0
33	1		73		1						2	1	1	1	1	1	0	0
34	1	35	40	4.6	1	1	0	2	4	2	1	2	1	1	0	2	1	0
35	1	58	59	1.8	0	3	3	2.2	4	3	2	1	0	1	1	2	1	0
36	1	56	69	12.6	1	2	2	0.57		1	0	2	0	0	1	1	1	1
37	1	39	51	12	1	2	1	4		3	3	0	0	1	1	2	1	1
38	1		49		0						3	1	0	1	0	1	0	0
39	1	64	73	9	0	5	5					2	0		1	1	1	0
40	1	43	44	1.6	1	3	1	1.37	4	2	2	0	1	1	1	2	1	0
41	1	42	45	3.1	0	0	0	1.9	4	2	1	0	0	1	1	2	1	0
42	1	69	71	1.7	1	1	4	2.7	4	3	2	2	1	1	1	2	1	0
43	1	39	40	1	1	2	1	4.3		4	3	2	0	1	0	2	1	0
44	1		48		1							0	1		1	1	0	0
45	1	74	75	1.2	1	1	1	4	3	3	0	2	1	0	1	2	1	1
45	2	74	75	1.2	1	2	1	2.2	3	3	0	2	1	0	1		1	1
45	3	70	75	4.7	1	1	1	3.33	3	3	0	2	1	0	1		1	1
46	1	72	76	4	1	0	4	11	5	4	0		1	0	1	2	1	0
47	1	64	64	0.3	0	4	1	2.4	4	3	1	2	0	1	0	2	1	0
48	1	69	72	3.3	1	3	0	3.6	5	3	3	2	1	1	1	2	1	0
49	1	81	82	0.8	0	3	4	10	5	4	2		0	1	1	2	1	0
50	1	65	66	1.8	1	0	1	1.7	4	2	0	2	1	0	0	3	1	0
51	1	52	60	8	1	1	0	0.64	4	1	2	2	1	1	0	2	1	0
52	1	67	70	3.3	0	4	2	0.25	3	1	0	2	0	0	1	2	1	1
53	1	66	69	3	0	4	1	3.4	4	3	3		1	1	1	2	1	0
54	1	66	71	4.9	0	4	3	1.25	3	2	3	2	0	1	1	0	1	1
54	2	67	71	3.3	0	1		1.48	3	2	3	2	0	1	1		1	1
55	1	31	33	2.1	1	4		4.5	4	4	3		1	1	1	2	1	0
56	1	61	63	2.7	0	2	1	4.45	4	4	3		0	1	1	2	1	0
57	1	40	41	1	0	5	5						1	1	1	2	1	0
58	1	37	43	5.5	1	3	0	0.5	2	1	1	2	1	1	1	2	1	0
59	1	35	35	0.1	1	1						0	0	1	1	1	1	0
60	1		71		0						2	2	1	1	1	2	0	0
61	1		72		1								1		0		0	0
62	1		58		0								1		1	2	1	0
63	1		43		0							0	0		1	1	0	0
64	1	48	50	2.2	1	1	4	10		4			0		1	1	1	0
65	1	82	88	6.7	1	0	1	3.6	4	3	2		0	1	1	1	1	0
66	1		37		0								0		0		0	0
67	1	52	54	2.1	1	2	1	2.5	4	3			0	1	0	2	1	0
68	1	70	71	1.2	1	1	1	8	4	4	1		0	1	0	2	1	0
69	1		10		1								1		0		0	0
70	1		78		1								0		0		0	0
71	1		63		1								1		0		0	0
72	1		66		1								0	1	1	1	0	0
73	1	45	51	5.5	0	2	1	4.5	4	4			1	1	1	2	1	0
74	1	68	70	2.1	1	3	0	1	4	1			1	1	1	2	1	0
75	1		60		0						3		1	1	1	2	0	0
76	1	74	84	10	1	4							0		0		1	0
77	1	55	57	1.9	1	1	1	3.85	4	3	1		1	1	1	2	1	0
78	1	73	74	1.2	1	1	1		5	3	3		0	1	1	2	1	0
79	1	45	47	2.2	1	2	0	1.5	4	2	1		1	1	1	2	1	0
80	1	73	75	1.8	1	0	2	2.8	5	3	0		0	0	1	2	1	0
81	1	52	70	18.1	0	1	0	1.73	4	2			0	1	1	1	1	1
81	2	70	70	0.3	0	4	0	0.9	4	1			0	1	1		1	1
82	1	67	69	2.3	1	2	1	1.9	4	2	3		1	1	1	2	1	0
83	1	46	48	2.8	0	3	4				2		1	1	1	2	1	0
84	1	65	77	11.8	0	3		1.8	4	2			1	1	1	2	1	0
85	1	70	72	2.5	0	3	1	4.2	3	4	1		1	1	1	2	1	0
86	1	78	82	4	1	1	0	2.6	3	3			0	1	1	2	1	0
87	1	53	57	3.3	1	1	1	4.25	4	4	1		0	1	1	2	1	0
88	1		71		1								0		0		0	0
89	1	72	73	1.1	1	4	3	8	5	4	3		0	1	0	2	1	0
90	1	58	80	21.7	1		0						0		1	1	1	1
91	1	46	49	3.6	0	1	0	1.3		2			1	1	1	1	1	0
92	1	48	50	1.9	0	1	1	3.2	4	3			1		1	1	1	0
93	1		62		1								0		0		0	0
94	1	38	45	7.6	0	4	0	1.5	3	2	1		0	1	0	2	1	0
95	1	50	52	1.2	1	0	1	5	5	4	0		1	0	1	2	1	0
96	1	49	69	20.5	1	4							1	1	1	2	1	0
97	1	58	61	2.8	1	2	0	1.35	3	2	2		0	1	1	2	1	0
98	1	27	60	33.2	1	4							1	1	1	2	1	0
99	1		65		1								0		1	2	0	0
100	1	54	62	8.5	1	1	1	2.27	4	3			1	1	1	1	1	0
101	1	55	65	10	1	2							1	1	1	2	1	0
102	1		53		1						3		1	1	1	1	0	0
103	1	35	41	6.2	1	2		3.65	4	3			0	1	1	2	1	0
104	1	62	73	11.5	0	3							0		1	0	1	0
105	1		50		0								0	1	1	2	0	0
106	1		65		0								1		1	2	0	0
106	1	67	70	3.6	0	4	1	8	4	4	2		1	1	1	2	1	0
108	1	37	37	0.5	1	1	4	0.73	4	1	0		0	0	0	3	1	1
108	2	37	37	0.1	1	4	1	2.25	4	3	0		0	0	0		1	1
109	1	71	83	12	1	0							1		1	0	1	0
110	1	62	65	2.4	1	0	1	4	4	3	3		0	1	1	2	1	0
111	1	48	60	11.5	0	1							1	1	1	1	1	0
112	1	64	67	3.2	1	6					0		1	0	1	2	1	0
113	1	38	39	1.5	1	0	1	1.85	4	2	3		1	1	1	2	1	0
114	1	58	59	0.9	1	2	0	0.4	3	1	1		1	1	0	2	1	1
115	1	64	67	2.7	1	0	1	2.75	4	3			0	1	0	2	1	0
116	1	28	38	10.1	1	3		2.02	3	3			0	1	1	2	1	1
117	1	48	55	7.7	1			2.68	4	3			1		1	2	1	0
118	1	29	32	2.8	0	4		1.8	4	2	1		0	1	1	2	1	0
119	1	50	55	5	1	4	3	5	5	4			0	1	1	2	1	0
120	1	47	51	4.3	1	0	1			4			1	1	1	2	1	0
121	1	15	26	11.5	0	0							1		0		1	0
122	1	58	60	2	1	4	1	2.4	3	3			0	1	0	2	1	0
123	1	49	53	3.5	1	0	0	0.9	4	1			0	1	1	2	1	0
124	1	28	31	3.8	0	1	0	2	4	2			1		1	2	1	0
125	1	73	74	1	0	5	5						1		1	2	1	0
126	1	67	70	3.4	0	0	2						1		1	0	1	0
127	1	52	52	0	1	1	0	0.2	2	1			0	1	1	1	1	0
128	1		61		1								0	0	1	1	1	0
129	1	36	39	2.9	0	3		3	4	3			0		1	1	1	0
130	1		76		1								0	1	1	2	0	0
131	1	55	58	3.5	0	3	1	1.75	4	3	0		0	0	0	3	1	0
132	1	54	58	3.4	1	4	1	2	3	3	1		0	1	0	2	1	0
133	1	57	64	6.8	0	1	0	1.48	4	2			1	1	1	2	1	0
134	1	52	61	9.1	1	1	0	1.9	4	2			0		0		1	1
135	1	62	63	1.2	1	3	3	3.84	4	3			1	1	1	2	1	0
136	1		81		1		4						1		0		1	0
137	1	41	47	6.3	0	4							0	1	1	2	1	1
138	1	35	39	3.8	1	0	0	1.7	3	2	1		1	1	0	2	1	0
139	1		46		1								1		0		0	0
140	1		62		1								1		0		0	0
141	1	61	63	1.5	1	3	0	0.7	3	1			1	1	1	2	1	0
142	1	46	61	15.2	1								0		1	2	1	0
143	1	41	48	7.2	0	5	5	1.9	4	2	0		1	0	1	1	1	0
144	1		57		1								1	1	1	2	0	0
145	1	74	74	0.2	1	1	1	8	4	4	2		1	1	1	2	1	0
146	1		42		1								0		0		0	0
147	1	59	59	0.3	1	1	1						1	1	1	2	1	0
148	1	67	67	0	1								0		0		1	0
149	1	64	66	2.4	1	4	1						1	1	1	2	1	0
150	1	40	42	1.3	0	4	3	1.7	4	2			0		1	2	1	0
151	1		71		1	1	0						0	1	0	2	1	0
152	1	30	32	2.1	0	2	0	1.24	4	2			0	1	0	2	1	0
153	1	30	31	1.3	0	1	1	1.6	4	2	1		0	1	1	1	1	0
154	1	43	50	6.9	0								0		1	2	1	0
155	1	53	64	10.6	1	1							1	1	1	2	1	0
156	1	63	67	4	1	2							0		0		1	0
157	1	48	49	1	0	3							1		0		1	0
158	1		50		1								0	1	1	2	1	0
159	1	55	61	5.6	1	4							0	1	0	2	1	0
160	1		62		1								0		0		1	0
161	1	53	57	3.7	1	2	0	4.85	4	4			0		1	2	1	0
162	1	53	57	3.6	1								0		0		1	0
163	1		37		0								0		1	0	0	0
164	1	60	64	3.7	1	2							1	1	1	2	1	0
165	1	36	45	8.6	0								1		0		1	0
166	1		39		1								0		0		1	0
167	1	35	39	3.7	1		4						1	1	1	2	1	0
168	1		56		1								1	1	1		0	0
169	1	33	36	3.2	1	1	1		4				0		1	2	1	0
170	1	48	48	0.1	1								0		1	1	1	0
171	1		46		1								1		0		1	0
172	1		78		0								1	1	1	2	1	0
173	1		69		1								0		0		1	0
174	1	57	62	5.3	1								1	1	1	1	1	0
175	1		63		1								0		0		1	0
176	1		74		1								0		0		1	0
177	1	51	56	4.8	0	3							1	1	0	2	1	0
178	1	46	53	7.4	1	0							0		0		1	0
179	1	25	29	3.5	1	4							0		0		1	0
180	1	18	21	3.1	1	1	0						1	1	1	0	1	0
181	1	61	65	3.7	0	4							0	1	1	1	1	0
182	1		56		1								1		0		1	0
183	1	59	60	1	1	5	5						0	1	1	2	1	0
184	1		47		0								1	1	0	2	0	0
185	1	60	67	7.2	0	4							0		0		1	0
186	1	33	41	7.6	0	0							0		0		1	0
187	1		31		1								0		0		0	0
188	1	46	60	14.1	1	0							0	1	1	2	1	1
189	1		55		0								0		0		1	0
190	1	59	64	5.4	0								0		0		1	0
191	1	63	64	1.4	0	1							0		0		1	0
192	1		50		0								0		1	2	1	0
193	1	42	49	6.5	1	2							1	1	0	0	1	0

## Sheet: Legend
Legend
Variable	Explanation of each variable	Encoding
Patient	Patient number (repetitive number means that this patient has more than one primary melanoma included in the study)	1 to 193
Melanoma	Melanoma number (numbered consecutively in patients with more than one primary melanoma included in the study)	1 = melanoma 1 of this patient, 2 = melanoma 2 of this patient, 3 = melanoma 3 of this patient
Age melanoma	Age at diagnosis of primary melanoma	in years
Age brain metastasis	Age at detection of brain metastasis	in years
Melanoma to brain mets	Time interval from primary tumour diagnosis to brain metastasis	in years
Sex	Gender	0 = female, 1 = male
Location melanoma	Location of primary melanoma	0 = head and neck, 1 = back, 2 = chest and abdomen, 3 = arms, 4 = legs, 5 = mucosa, 6 = iris
Subtype melanoma	Subtype of primary melanoma	0 = SSM, 1 = NM, 2 = LMM, 3 = ALM, 4 = Other variants, 5 = Mucosal
Breslow	Breslow tumour thickness	in mm
Clark	Clark level	1 = I, 2 = II, 3 = III, 4 = IV, 5 = V
T classification	T-classification of the primary melanoma according to the AJCC cutaneous melanoma classification	1 = T1, 2 = T2, 3 = T3, 4 = T4
N classification	N-classification of the regional lymph nodes according to the AJCC cutaneous melanoma classification	0 = N0, 1 = N1, 2 = N2, 3 = N3
Mutation status	Mutation status of melanoma metastasis for BRAF and NRAS	0 = BRAF mutation, 1 = NRAS mutation, 2 = BRAF wild-type
Extent brain mets	Extent of metastatic spread to the brain at the time when brain metastasis was detected	0 = solitary brain metastasis, 1 = multiple brain metastases
Lymph node status	Lymph node status at the time when brain metastasis was detected	0 = negative lymph nodes, 1 = lymph node metastases
Other metastases	Metastases apart from lymph nodes and brain in the course of the disease	0 = no metastases apart from lymph nodes and brain, 1 = metastases apart from lymph nodes and brain
Time course	When was brain metastasis diagnosed in relation to metastasis of other organs	0 = before, 1 = simultaneous (within 2 months), 2 = later, 3 = only brain metastasis present
Primary melanoma	Melanoma metastasis of unknown or known primary	0 = primary melanoma unknown, 1 = primary melanoma known
Second melanoma	History of a second primary melanoma	0 = no, 1 = yes
Abbreviations	Definition
SSM	superficial spreading melanoma
NM	nodular melanoma
LMM	lentigo maligna melanoma
ALM	acral lentiginous melanoma
